# Supplementary material for: Conflict-related excess mortality and disability in Northwest Syria
Source: PubMed Central journal article supplement — BMJ Glob Health. 2022 May 18;7(5):e008624. doi: 10.1136/bmjgh-2022-008624 (PMC9121437; doi:10.1136/bmjgh-2022-008624), 2022-05-18
Supplement: bmjgh-2022-008624supp001.pdf [file bmjgh-2022-008624supp001.pdf]

**Supplementary File 1:**

The geographic population units in the NWS region with their population size and cluster allocation according to the PPS approach

| Governorate          | Geographical unit      | Population size | Cluster Number(s)                 | Cluster Name(s)                                                                                                                        |
|----------------------|------------------------|-----------------|-----------------------------------|----------------------------------------------------------------------------------------------------------------------------------------|
| Idlib<br>32 clusters | Ariha                  | 66238           | 1                                 | Ariha                                                                                                                                  |
|                      | Ehsem                  | 14826           |                                   |                                                                                                                                        |
|                      | Mhambal                | 40394           | 2                                 | Mhambal                                                                                                                                |
|                      | Armanaz                | 74599           | 3                                 | Milis                                                                                                                                  |
|                      | Dana                   | 1075395         | 4,5,6,7,8,9,10,<br>11,12,13,14,15 | Sarmada, Aldana, Kafr Deryan,Qah,Selwa,<br>Termanin, Tilaada, Tal Elkarama camp<br>AlKarameh camp, Al-Sarowt camp, Kafr Lusin<br>camp, |
|                      | Harim                  | 70975           | 16                                | Harim                                                                                                                                  |
|                      | Kafr Takharim          | 38012           |                                   |                                                                                                                                        |
|                      | Qourqeena              | 101566          | 17,18                             | Qourqeena, Kafr Aruq camp                                                                                                              |
|                      | Salqin                 | 277914          | 19,20,21                          | Azmarin, Saidiyeh, Abu Talha camp                                                                                                      |
|                      | Bennsh                 | 36241           |                                   |                                                                                                                                        |
|                      | Idlib                  | 297699          | 22,23,24,25                       | North Neighbourhood, South N., East N.,<br>Surrounding camp.                                                                           |
|                      | Maaret Tamsrin         | 260140          | 26,27,28                          | Hazano, Kelly camp, Ram Hamdan                                                                                                         |
|                      | Sarmin                 | 11278           |                                   |                                                                                                                                        |
|                      | Teftnaz                | 5195            |                                   |                                                                                                                                        |
|                      | Badama                 | 56468           | 29                                | Salah Alden (Kherbet Eljoz) camp                                                                                                       |
|                      | Darkosh                | 94435           | 30                                | Zarzur camp                                                                                                                            |
|                      | Janudiyeh              | 64651           |                                   |                                                                                                                                        |
|                      | Jisr-Ash-Shugur        | 92508           | 31,32                             | Meshmeshan and Konia, Western Marj Akhdar                                                                                              |
|                      | Afrin                  | 175067          | 33,34                             | Afrin city, Basuta                                                                                                                     |
|                      | Bulbul                 | 20119           | 35                                | Bulbul                                                                                                                                 |
|                      | Jandairis              | 97636           | 36                                | Jandairis camp                                                                                                                         |
|                      | Mabtali                | 24438           |                                   |                                                                                                                                        |
|                      | Raju                   | 44297           | 37                                | Raju                                                                                                                                   |
|                      | Sharan                 | 58322           |                                   |                                                                                                                                        |
|                      | Sheikh El-Hadid        | 12116           |                                   |                                                                                                                                        |
|                      | Al Bab                 | 186767          | 38, 39, 40                        | Bazagha, Blue camp, Al Bab                                                                                                             |
|                      | Arima                  | 39663           |                                   |                                                                                                                                        |
|                      | Ar-Raee                | 22729           |                                   |                                                                                                                                        |
|                      | Rasm Haram El-<br>Imam | 12725           |                                   |                                                                                                                                        |
|                      | Tadaf                  | 15627           |                                   |                                                                                                                                        |
|                      | Aghtrin                | 104997          | 41                                | Aghtrin                                                                                                                                |
|                      | Aleppo<br>18 clusters  |                 |                                   |                                                                                                                                        |

---

|                |        |                |                                            |
|----------------|--------|----------------|--------------------------------------------|
| Azaz           | 349031 | 42, 43, 44, 45 | Kaljibrin, Yazbag camp, Catmeh camp , Azaz |
| Mare           | 47417  | 46             | Mare                                       |
| Suran - Aleppo | 95145  | 47             | Ehteimlat                                  |
| Ghandorah      | 25007  | 48             | Ghandorah                                  |
| Jarablus       | 74404  | 49             | Jarablus                                   |
| Atareb         | 97964  | 50             | Kafr Karmin Camp                           |
| Daret Azza     | 51117  |                |                                            |

---
