# Supplementary material for: Conflict-related excess mortality and disability in Northwest Syria
Source: PubMed Central journal article supplement — BMJ Glob Health. 2022 May 18;7(5):e008624. doi: 10.1136/bmjgh-2022-008624 (PMC9121437; doi:10.1136/bmjgh-2022-008624), 2022-05-18
Supplement: bmjgh-2022-008624supp003.pdf [file bmjgh-2022-008624supp003.pdf]

**Supplementary File 3: Crude Mortality Rate (CMR) deaths/year in 10,000 (2000-2020)**

| Year  | Births | Deaths | Population | Birth Rate/1000 | CMR deaths/year in 10,000 | CMR - Non-violent deaths | CMR - violence-related deaths | U1MR    | U5MR    |
|-------|--------|--------|------------|-----------------|---------------------------|--------------------------|-------------------------------|---------|---------|
| 2000  | 356    | 14     | 6106       | 58.3            | 22.9283                   | 22.9283                  | 0                             | 3.27547 | 4.9132  |
| 2001  | 200    | 6      | 6448       | 31.02           | 9.30521                   | 9.30521                  | 0                             | 1.55087 | 1.55087 |
| 2002  | 277    | 7      | 6642       | 41.7            | 10.539                    | 10.539                   | 0                             | 0       | 0       |
| 2003  | 261    | 8      | 6912       | 37.76           | 11.5741                   | 11.5741                  | 0                             | 1.44676 | 2.89352 |
| 2004  | 270    | 9      | 7165       | 37.68           | 12.5611                   | 11.1654                  | 1.39567                       | 2.79135 | 2.79135 |
| 2005  | 284    | 15     | 7426       | 38.24           | 20.1993                   | 20.1993                  | 0                             | 1.34662 | 1.34662 |
| 2006  | 247    | 18     | 7695       | 32.1            | 23.3918                   | 23.3918                  | 0                             | 6.49773 | 12.9955 |
| 2007  | 228    | 13     | 7924       | 28.77           | 16.4059                   | 16.4059                  | 0                             | 2.52398 | 2.52398 |
| 2008  | 277    | 11     | 8139       | 34.03           | 13.5152                   | 13.5152                  | 0                             | 3.68596 | 4.91461 |
| 2009  | 227    | 15     | 8405       | 27.01           | 17.8465                   | 16.6568                  | 1.18977                       | 3.5693  | 3.5693  |
| 2010  | 315    | 16     | 8617       | 36.56           | 18.5679                   | 17.4075                  | 1.1605                        | 5.80248 | 5.80248 |
| 2011  | 254    | 40     | 8916       | 28.49           | 44.8632                   | 26.9179                  | 17.9453                       | 4.48632 | 5.6079  |
| 2012  | 257    | 66     | 9130       | 28.15           | 72.2892                   | 19.7152                  | 52.5739                       | 2.19058 | 7.66703 |
| 2013  | 240    | 59     | 9321       | 25.75           | 63.2979                   | 22.5298                  | 40.7682                       | 0       | 2.14569 |
| 2014  | 319    | 55     | 9502       | 33.57           | 57.8826                   | 26.3103                  | 31.5723                       | 7.36687 | 9.47169 |
| 2015  | 323    | 73     | 9766       | 33.07           | 74.7491                   | 31.7428                  | 43.0063                       | 8.19169 | 11.2636 |
| 2016  | 409    | 70     | 10016      | 40.83           | 69.8882                   | 24.9601                  | 44.9281                       | 4.99201 | 9.98403 |
| 2017  | 420    | 67     | 10355      | 40.56           | 64.703                    | 38.6287                  | 26.0744                       | 7.72574 | 13.52   |
| 2018  | 381    | 48     | 10708      | 35.58           | 44.8263                   | 28.0164                  | 16.8099                       | 3.73552 | 7.47105 |
| 2019  | 319    | 46     | 11041      | 28.89           | 41.6629                   | 30.7943                  | 10.8686                       | 4.52858 | 5.43429 |
| 2020  | 298    | 42     | 11314      | 26.34           | 37.1221                   | 28.2835                  | 8.83861                       | 4.4193  | 8.83861 |
| Total | 6162   | 698    |            |                 |                           |                          |                               |         |         |
