# Supplementary material for: Conflict-related excess mortality and disability in Northwest Syria
Source: PubMed Central journal article supplement — BMJ Glob Health. 2022 May 18;7(5):e008624. doi: 10.1136/bmjgh-2022-008624 (PMC9121437; doi:10.1136/bmjgh-2022-008624), 2022-05-18

**Supplementary File 4:** The distribution of substantial violence-related disabilities (SVRD) according to the year of injury and the gender.

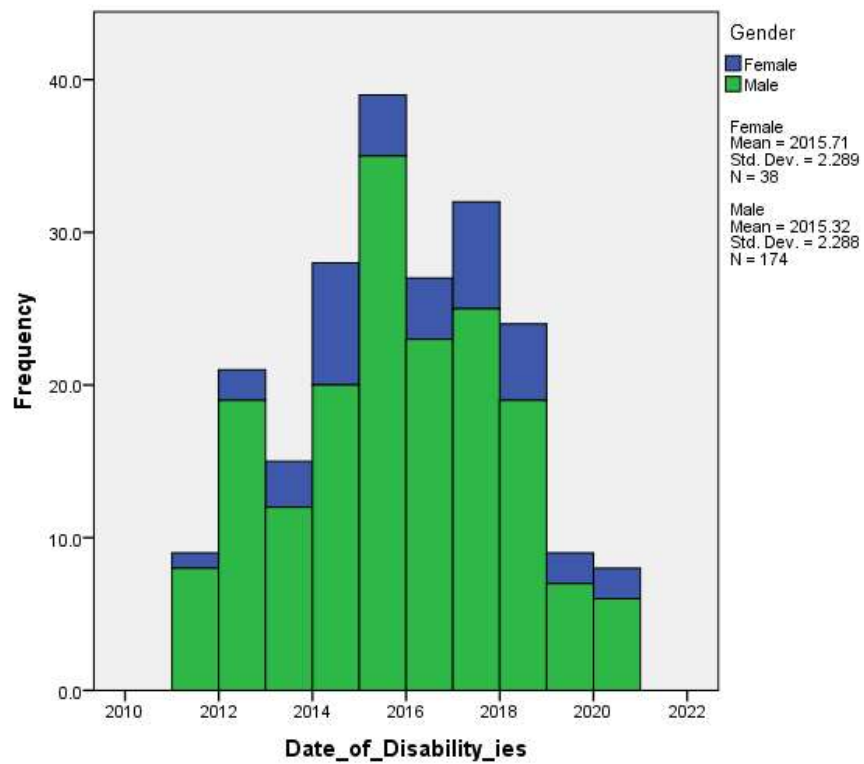

Supplement: bmjgh-2022-008624supp004.pdf [file bmjgh-2022-008624supp004.pdf]
