# Supplementary material for: Conflict-related excess mortality and disability in Northwest Syria
Source: PubMed Central journal article supplement — BMJ Glob Health. 2022 May 18;7(5):e008624. doi: 10.1136/bmjgh-2022-008624 (PMC9121437; doi:10.1136/bmjgh-2022-008624), 2022-05-18
Supplement: bmjgh-2022-008624supp005.pdf [file bmjgh-2022-008624supp005.pdf]

**Supplementary File 5:** Types of disability

|                                                              | Frequency | Percent |
|--------------------------------------------------------------|-----------|---------|
| <b>Cause-specific substantial violent related disability</b> |           |         |
| Paralysis due to spinal cord trauma                          | 17        | 7.6     |
| Partial or complete amputation of limbs                      | 26        | 11.6    |
| Physical limb deformation resulting in movement impairment   | 64        | 28.6    |
| Physical or cognitive limitations due to neurotrauma         | 46        | 20.5    |
| Confirmed psychological disorder                             | 6         | 2.7     |
| Sensory disability such as blindness and deafness            | 29        | 12.9    |
| Burns                                                        | 4         | 1.8     |
| Multiple                                                     | 18        | 8.0     |
| Other                                                        | 14        | 6.3     |
