# Supplementary material for: Conflict-related excess mortality and disability in Northwest Syria
Source: PubMed Central journal article supplement — BMJ Glob Health. 2022 May 18;7(5):e008624. doi: 10.1136/bmjgh-2022-008624 (PMC9121437; doi:10.1136/bmjgh-2022-008624), 2022-05-18

**Supplementary File 6:** Chronological trends of proportions of the primary cause of death 2011-2020. An epidemiological transition point in mortality patterns in 2017 is noted where most conflict time mortalities were not violence-related.

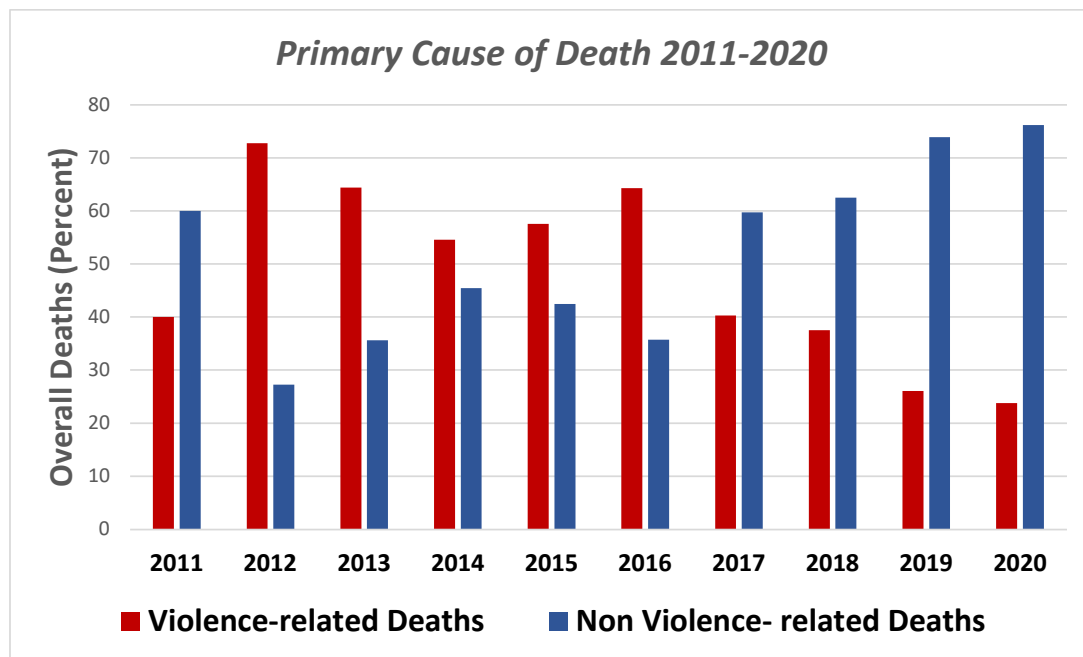

Supplement: bmjgh-2022-008624supp006.pdf [file bmjgh-2022-008624supp006.pdf]
